# Supplementary material for: Standardization of Data Analysis for RT-QuIC-Based Detection of Chronic Wasting Disease
Source: MDPI journal article supplement (doi:10.3390/pathogens12020309), 2023-02-13
Supplement: s1 [file s1]

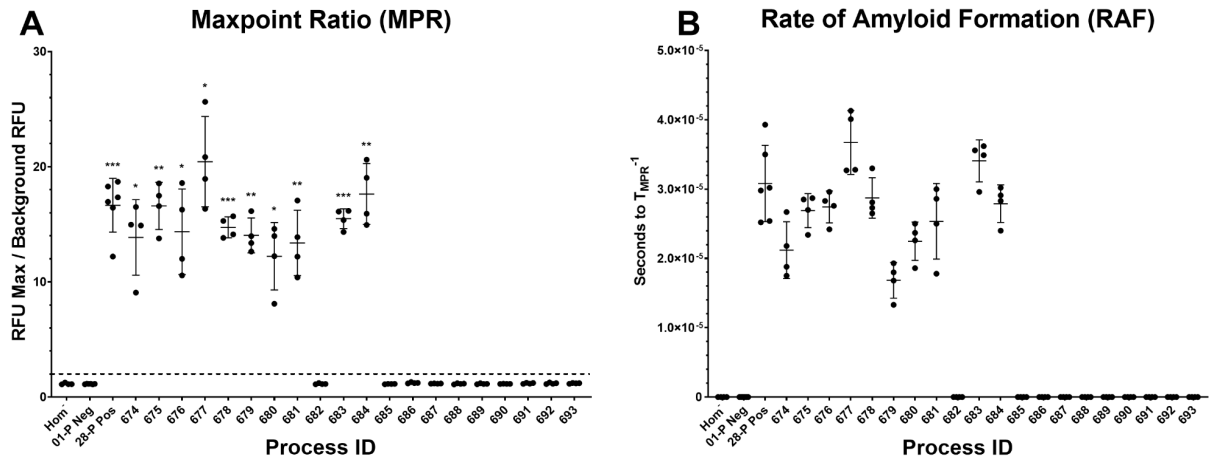

**Supplementary Figure S1** - Example graphs highlighting the maxpoint ratio (MPR) and their correlated amyloid formation rates (RAF). **(A)** MPRs for each sample are shown with bars at the median extending one standard deviation. The dotted line represents the MPR threshold ( $T_{MPR}$ ) for RAF calculation and is set permanently at two. Significance is determined by comparing samples' MPRs to the negative control MPRs with a one-way ANOVA and a Dunnett's multiple comparisons test (\*,  $p > 0.05$ ; \*\*,  $p > 0.01$ ; \*\*\*,  $p > 0.001$ ). **(B)** RAFs were calculated by taking the reciprocal of seconds needed to pass  $T_{MPR}$ .
